# Supplementary material for: Path-dependency of energy decomposition analysis & the elusive nature of bonding
Source: Royal Society of Chemistry journal article supplement (doi:10.1039/d1cp04135e), 2021-11-01
Supplement: d1cp04135e1.pdf [file d1cp04135e1.pdf]

*Electronic Supplementary Information*

**Path-Dependency of Energy Decomposition Analysis &  
the Elusive Nature of Bonding**

Jordi Poater<sup>1,2\*</sup>, Diego M. Andrada<sup>3\*</sup>, Miquel Solà<sup>4\*</sup>, Cina Foroutan-Nejad<sup>5\*</sup>

<sup>1</sup> *Departament de Química Inorgànica i Orgànica and IQTCUB, Universitat de Barcelona, Martí i Franquès 1-11, 08028 Barcelona, Catalonia, Spain*

<sup>2</sup> *ICREA, Pg. Lluís Companys 23, 08010 Barcelona, Spain*<sup>3</sup> *Faculty of Natural Sciences and Technology, Department of Chemistry, Saarland University, 66123 Saarbrücken, Federal Republic of Germany.*

<sup>4</sup> *Institut de Química Computacional i Catàlisi (IQCC) and Departament de Química, Universitat de Girona, C/ Maria Aurèlia Capmany 69, 17003 Girona, Catalonia, Spain*

<sup>5</sup> *Institute of Organic Chemistry, Polish Academy of Sciences, Kasprzaka44/52, 01-224, Warsaw, Poland*

Corresponding Author's Emails:

Jordi Poater: [jordi.poater@ub.edu](mailto:jordi.poater@ub.edu)

Diego M. Andrada: [diego.andrada@uni-saarland.de](mailto:diego.andrada@uni-saarland.de)

Miquel Solà: [miquel.sola@udg.edu](mailto:miquel.sola@udg.edu)

Cina Foroutan-Nejad: [cforoutan-nejad@icho.edu.pl](mailto:cforoutan-nejad@icho.edu.pl)

**Table S1.** Cartesian coordinates (in Å) and electronic energy (in kcal mol<sup>-1</sup>) of all M<sub>2</sub>X<sub>2</sub> systems under analysis at the ZORA-BLYP/TZ2P level of theory.

**Li<sub>2</sub>F<sub>2</sub>** (-378.10)

|      |          |           |           |
|------|----------|-----------|-----------|
| 1.Li | 0.000000 | 1.112316  | 0.000000  |
| 2.F  | 0.000000 | 0.000000  | -1.337827 |
| 3.F  | 0.000000 | 0.000000  | 1.337827  |
| 4.Li | 0.000000 | -1.112316 | 0.000000  |

**Li<sub>2</sub>I<sub>2</sub>** (-224.03)

|      |          |           |           |
|------|----------|-----------|-----------|
| 1.Li | 0.000000 | 1.393888  | 0.000000  |
| 2.I  | 0.000000 | 0.000000  | -2.197345 |
| 3.Li | 0.000000 | -1.393888 | 0.000000  |
| 4.I  | 0.000000 | 0.000000  | 2.197345  |

**Cs<sub>2</sub>I<sub>2</sub>** (-195.58)

|      |          |           |           |
|------|----------|-----------|-----------|
| 1.Cs | 0.000000 | 2.476692  | 0.000000  |
| 2.I  | 0.000000 | 0.000000  | -2.649959 |
| 3.Cs | 0.000000 | -2.476692 | 0.000000  |
| 4.I  | 0.000000 | 0.000000  | 2.649959  |

**Be<sub>2</sub>O<sub>2</sub>** (-473.18)

|      |          |           |           |
|------|----------|-----------|-----------|
| 1.Be | 0.000000 | 0.864583  | 0.000000  |
| 2.O  | 0.000000 | 0.000000  | -1.211816 |
| 3.Be | 0.000000 | -0.864583 | 0.000000  |
| 4.O  | 0.000000 | 0.000000  | 1.211816  |

**Be<sub>2</sub>S<sub>2</sub>** (-327.76)

|      |          |           |           |
|------|----------|-----------|-----------|
| 1.Be | 0.000000 | 0.966901  | 0.000000  |
| 2.S  | 0.000000 | 0.000000  | -1.667858 |
| 3.Be | 0.000000 | -0.966901 | 0.000000  |
| 4.S  | 0.000000 | 0.000000  | 1.667858  |

**Be<sub>2</sub>Se<sub>2</sub>** (-289.51)

|      |          |           |           |
|------|----------|-----------|-----------|
| 1.Be | 0.000000 | 0.996091  | 0.000000  |
| 2.Se | 0.000000 | 0.000000  | -1.807054 |
| 3.Be | 0.000000 | -0.996091 | 0.000000  |
| 4.Se | 0.000000 | 0.000000  | 1.807054  |

**Be<sub>2</sub>Te<sub>2</sub>** (-239.03)

|      |          |           |           |
|------|----------|-----------|-----------|
| 1.Be | 0.000000 | 1.034713  | 0.000000  |
| 2.Te | 0.000000 | 0.000000  | -2.033021 |
| 3.Be | 0.000000 | -1.034713 | 0.000000  |
| 4.Te | 0.000000 | 0.000000  | 2.033021  |

**Mg<sub>2</sub>O<sub>2</sub>** (-334.76)

|      |          |           |           |
|------|----------|-----------|-----------|
| 1.Mg | 0.000000 | 1.208250  | 0.000000  |
| 2.O  | 0.000000 | 0.000000  | -1.448050 |
| 3.Mg | 0.000000 | -1.208250 | 0.000000  |
| 4.O  | 0.000000 | 0.000000  | 1.448050  |

**Mg<sub>2</sub>S<sub>2</sub>** (-237.42)

|      |          |           |           |
|------|----------|-----------|-----------|
| 1.Mg | 0.000000 | 1.325569  | 0.000000  |
| 2.S  | 0.000000 | 0.000000  | -1.923848 |
| 3.Mg | 0.000000 | -1.325569 | 0.000000  |
| 4.S  | 0.000000 | 0.000000  | 1.923848  |

**Mg<sub>2</sub>Se<sub>2</sub>** (-212.19)

|      |          |           |           |
|------|----------|-----------|-----------|
| 1.Mg | 0.000000 | 1.356781  | 0.000000  |
| 2.Se | 0.000000 | 0.000000  | -2.057708 |
| 3.Mg | 0.000000 | -1.356781 | 0.000000  |
| 4.Se | 0.000000 | 0.000000  | 2.057708  |

**Ba<sub>2</sub>O<sub>2</sub>** (-431.80)

|                                               |           |           |           |
|-----------------------------------------------|-----------|-----------|-----------|
| 1.Ba                                          | 0.000000  | 1.758860  | 0.000000  |
| 2.O                                           | 0.000000  | 0.000000  | -1.457328 |
| 3.Ba                                          | 0.000000  | -1.758860 | 0.000000  |
| 4.O                                           | 0.000000  | 0.000000  | 1.457328  |
| <b>Ba<sub>2</sub>Se<sub>2</sub></b> (-291.63) |           |           |           |
| 1.Ba                                          | 0.000000  | 2.060208  | 0.000000  |
| 2.Se                                          | 0.000000  | 0.000000  | -2.113937 |
| 3.Ba                                          | 0.000000  | -2.060208 | 0.000000  |
| 4.Se                                          | 0.000000  | 0.000000  | 2.113937  |
| <b>Ba<sub>2</sub>Te<sub>2</sub></b> (-251.89) |           |           |           |
| 1.Ba                                          | 0.000000  | 2.140377  | 0.000000  |
| 2.Te                                          | 0.000000  | 0.000000  | -2.372857 |
| 3.Ba                                          | 0.000000  | -2.140377 | 0.000000  |
| 4.Te                                          | 0.000000  | 0.000000  | 2.372857  |
| <br>                                          |           |           |           |
| <b>B<sub>2</sub>N<sub>2</sub></b> (-450.31)   |           |           |           |
| 1.B                                           | 0.000000  | 1.506885  | 0.000000  |
| 2.N                                           | 0.000000  | 0.000000  | -0.648131 |
| 3.B                                           | 0.000000  | -1.506885 | 0.000000  |
| 4.N                                           | 0.000000  | 0.000000  | 0.648131  |
| <b>B<sub>2</sub>P<sub>2</sub></b> (-375.65)   |           |           |           |
| 1.B                                           | -0.795110 | 0.006147  | 0.007309  |
| 2.P                                           | 0.004919  | -1.674785 | 0.022881  |
| 3.P                                           | 0.007423  | 1.687342  | -0.007255 |
| 4.B                                           | 0.807768  | 0.006296  | 0.008319  |
| <b>B<sub>2</sub>As<sub>2</sub></b> (-310.58)  |           |           |           |
| 1.B                                           | 0.000000  | 1.005312  | 0.000000  |
| 2.As                                          | 0.000000  | 0.000000  | -1.688464 |
| 3.B                                           | 0.000000  | -1.005312 | 0.000000  |
| 4.As                                          | 0.000000  | 0.000000  | 1.688464  |
| <b>B<sub>2</sub>Sb<sub>2</sub></b> (-284.14)  |           |           |           |
| 1.B                                           | 0.000000  | 0.883559  | 0.000000  |
| 2.Sb                                          | 0.000000  | 0.000000  | -1.964706 |
| 3.B                                           | 0.000000  | -0.883559 | 0.000000  |
| 4.Sb                                          | 0.000000  | 0.000000  | 1.964706  |
| <b>Al<sub>2</sub>As<sub>2</sub></b> (-253.93) |           |           |           |
| 1.Al                                          | 0.207997  | 0.432852  | 1.640815  |
| 2.As                                          | -1.253733 | -0.568107 | 0.000000  |
| 3.As                                          | 1.852247  | -0.226870 | 0.000000  |
| 4.Al                                          | 0.207997  | 0.432852  | -1.640815 |
| <br>                                          |           |           |           |
| <b>Ga<sub>2</sub>N<sub>2</sub></b> (-329.27)  |           |           |           |
| 1.Ga                                          | -1.509689 | 0.000000  | 0.020413  |
| 2.N                                           | 0.000000  | -1.155901 | -0.000158 |
| 3.Ga                                          | 1.509689  | 0.000000  | 0.020413  |
| 4.N                                           | 0.000000  | 1.155901  | -0.000158 |
| <b>Ga<sub>2</sub>P<sub>2</sub></b> (-206.19)  |           |           |           |
| 1.Ga                                          | 0.000000  | 1.505328  | 0.000000  |
| 2.P                                           | 0.000000  | 0.000000  | -1.838686 |
| 3.Ga                                          | 0.000000  | -1.505328 | 0.000000  |
| 4.P                                           | 0.000000  | 0.000000  | 1.838686  |
| <b>Ga<sub>2</sub>As<sub>2</sub></b> (-192.07) |           |           |           |
| 1.Ga                                          | 0.000000  | 1.548680  | 0.000000  |
| 2.As                                          | 0.000000  | 0.000000  | -1.934219 |
| 3.Ga                                          | 0.000000  | -1.548680 | 0.000000  |
| 4.As                                          | 0.000000  | 0.000000  | 1.934219  |
| <br>                                          |           |           |           |
| <b>In<sub>2</sub>N<sub>2</sub></b> (-396.03)  |           |           |           |

|                                               |           |           |           |
|-----------------------------------------------|-----------|-----------|-----------|
| 1.In                                          | -2.395882 | 0.000000  | 0.010127  |
| 2.N                                           | 0.000000  | -0.607592 | 0.010127  |
| 3.In                                          | 2.395882  | 0.000000  | 0.010127  |
| 4.N                                           | 0.000000  | 0.607592  | 0.010127  |
| <b>In<sub>2</sub>P<sub>2</sub></b> (-214.13)  |           |           |           |
| 1.In                                          | 0.000000  | 1.677216  | 0.000000  |
| 2.P                                           | 0.000000  | 0.000000  | -1.987447 |
| 3.In                                          | 0.000000  | -1.677216 | 0.000000  |
| 4.P                                           | 0.000000  | 0.000000  | 1.987447  |
| <b>In<sub>2</sub>As<sub>2</sub></b> (-204.02) |           |           |           |
| 1.In                                          | 0.000000  | 1.710666  | 0.000000  |
| 2.As                                          | 0.000000  | 0.000000  | -2.079756 |
| 3.In                                          | 0.000000  | -1.710666 | 0.000000  |
| 4.As                                          | 0.000000  | 0.000000  | 2.079756  |
| <b>Tl<sub>2</sub>N<sub>2</sub></b> (-390.83)  |           |           |           |
| 1.Tl                                          | -2.575736 | 0.000000  | 0.010127  |
| 2.N                                           | 0.000000  | -0.593661 | 0.010127  |
| 3.Tl                                          | 2.575736  | 0.000000  | 0.010127  |
| 4.N                                           | 0.000000  | 0.593661  | 0.010127  |
| <b>Tl<sub>2</sub>As<sub>2</sub></b> (-184.61) |           |           |           |
| 1.Tl                                          | 0.000000  | 2.106571  | 0.000000  |
| 2.As                                          | 0.000000  | 0.000000  | -1.702548 |
| 3.Tl                                          | 0.000000  | -2.106571 | 0.000000  |
| 4.As                                          | 0.000000  | 0.000000  | 1.702548  |
| <b>Ag<sub>2</sub>Cl<sub>2</sub></b> (-185.88) |           |           |           |
| 1.Ag                                          | 0.000000  | 1.426227  | 0.000000  |
| 2.Cl                                          | 0.000000  | 0.000000  | -2.105713 |
| 3.Cl                                          | 0.000000  | 0.000000  | 2.105713  |
| 4.Ag                                          | 0.000000  | -1.426227 | 0.000000  |
| <b>Ag<sub>2</sub>Br<sub>2</sub></b> (-172.40) |           |           |           |
| 1.Ag                                          | 0.000000  | 1.417299  | 0.000000  |
| 2.Br                                          | 0.000000  | 0.000000  | -2.246899 |
| 3.Br                                          | 0.000000  | 0.000000  | 2.246899  |
| 4.Ag                                          | 0.000000  | -1.417299 | 0.000000  |
| <b>Ag<sub>2</sub>I<sub>2</sub></b> (-156.08)  |           |           |           |
| 1.Ag                                          | 0.000000  | 1.408121  | 0.000000  |
| 2.I                                           | 0.000000  | 0.000000  | -2.432020 |
| 3.I                                           | 0.000000  | 0.000000  | 2.432020  |
| 4.Ag                                          | 0.000000  | -1.408121 | 0.000000  |
| <b>Hg<sub>2</sub>O<sub>2</sub></b> (-137.68)  |           |           |           |
| 1.Hg                                          | 0.000000  | 1.449251  | 0.000000  |
| 2.O                                           | 0.000000  | 0.000000  | -1.676602 |
| 3.Hg                                          | 0.000000  | -1.449251 | 0.000000  |
| 4.O                                           | 0.000000  | 0.000000  | 1.676602  |
| <b>Hg<sub>2</sub>S<sub>2</sub></b> (-101.59)  |           |           |           |
| 1.Hg                                          | 0.000000  | 1.457218  | 0.000000  |
| 2.S                                           | 0.000000  | 0.000000  | -2.101081 |
| 3.Hg                                          | 0.000000  | -1.457218 | 0.000000  |
| 4.S                                           | 0.000000  | 0.000000  | 2.101081  |

**Table S2.** Energy decomposition analysis data (in kcal mol<sup>-1</sup>) for the 9 different paths (Figure 1) of all M<sub>2</sub>X<sub>2</sub> systems under analysis at the ZORA-BLYP/TZ2P level of theory. Standard deviation is also enclosed (in italics).

**Li<sub>2</sub>F<sub>2</sub>**

| <i>paths</i>  | $\Delta E_{\text{int}}$ | $\Delta E_{\text{Pauli}}$ | $\Delta E_{\text{elstat}}$ | $\Delta E_{\text{oi}}$ | <i>%elstat</i> | <i>%oi</i> |
|---------------|-------------------------|---------------------------|----------------------------|------------------------|----------------|------------|
| <b>Path 1</b> | -445.5                  | 85.6                      | -488.7                     | -42.4                  | 92.0           | 8.0        |
| <b>Path 2</b> | -445.5                  | 93.8                      | -470.3                     | -69.0                  | 87.2           | 12.8       |
| <b>Path 3</b> | -445.5                  | 72.1                      | -439.1                     | -78.5                  | 84.8           | 15.2       |
| <b>Path 4</b> | -445.5                  | 90.9                      | -470.0                     | -66.4                  | 87.6           | 12.4       |
| <b>Path 5</b> | -445.5                  | 89.7                      | -471.0                     | -64.2                  | 88.0           | 12.0       |
| <b>Path 6</b> | -445.5                  | 89.9                      | -479.1                     | -56.2                  | 89.5           | 10.5       |
| <b>Path 7</b> | -445.5                  | 85.8                      | -487.6                     | -43.7                  | 91.8           | 8.2        |
| <b>Path 8</b> | -445.5                  | 80.5                      | -451.7                     | -74.2                  | 85.9           | 14.1       |
| <b>Path 9</b> | -445.5                  | 71.0                      | -435.4                     | -81.1                  | 84.3           | 15.7       |
|               | <i>0.0</i>              | <i>7.1</i>                | <i>16.6</i>                | <i>13.4</i>            | <i>2.8</i>     | <i>2.8</i> |

**Li<sub>2</sub>I<sub>2</sub>**

| <i>paths</i>  | $\Delta E_{\text{int}}$ | $\Delta E_{\text{Pauli}}$ | $\Delta E_{\text{elstat}}$ | $\Delta E_{\text{oi}}$ | <i>%elstat</i> | <i>%oi</i> |
|---------------|-------------------------|---------------------------|----------------------------|------------------------|----------------|------------|
| <b>Path 1</b> | -319.5                  | 58.9                      | -303.7                     | -74.7                  | 80.3           | 19.7       |
| <b>Path 2</b> | -319.5                  | 63.2                      | -301.7                     | -81.1                  | 78.8           | 21.2       |
| <b>Path 3</b> | -319.5                  | 44.3                      | -255.5                     | -108.3                 | 70.2           | 29.8       |
| <b>Path 4</b> | -319.5                  | 63.4                      | -293.5                     | -89.4                  | 76.6           | 23.4       |
| <b>Path 5</b> | -319.5                  | 63.8                      | -281.6                     | -101.7                 | 73.5           | 26.5       |
| <b>Path 6</b> | -319.5                  | 61.3                      | -304.0                     | -76.8                  | 79.8           | 20.2       |
| <b>Path 7</b> | -319.5                  | 58.9                      | -303.5                     | -75.0                  | 80.2           | 19.8       |
| <b>Path 8</b> | -319.5                  | 52.4                      | -286.7                     | -85.2                  | 77.1           | 22.9       |
| <b>Path 9</b> | -319.5                  | 43.2                      | -274.1                     | -88.6                  | 75.6           | 24.4       |
|               | <i>0.0</i>              | <i>6.9</i>                | <i>18.0</i>                | <i>13.6</i>            | <i>3.4</i>     | <i>3.4</i> |

**Cs<sub>2</sub>I<sub>2</sub>**

| <i>paths</i>  | $\Delta E_{\text{int}}$ | $\Delta E_{\text{Pauli}}$ | $\Delta E_{\text{elstat}}$ | $\Delta E_{\text{oi}}$ | <i>%elstat</i> | <i>%oi</i> |
|---------------|-------------------------|---------------------------|----------------------------|------------------------|----------------|------------|
| <b>Path 1</b> | -224.5                  | 71.4                      | -267.1                     | -28.9                  | 90.2           | 9.8        |
| <b>Path 2</b> | -224.5                  | 68.6                      | -246.6                     | -46.5                  | 84.1           | 15.9       |
| <b>Path 3</b> | -224.5                  | 66.5                      | -245.3                     | -45.8                  | 84.3           | 15.7       |
| <b>Path 4</b> | -224.5                  | 70.2                      | -249.8                     | -45.0                  | 84.7           | 15.3       |
| <b>Path 5</b> | -224.5                  | 72.4                      | -252.6                     | -44.3                  | 85.1           | 14.9       |
| <b>Path 6</b> | -224.5                  | 69.9                      | -255.7                     | -38.8                  | 86.8           | 13.2       |
| <b>Path 7</b> | -224.5                  | 71.3                      | -261.9                     | -34.0                  | 88.5           | 11.5       |
| <b>Path 8</b> | -224.5                  | 65.3                      | -243.7                     | -46.2                  | 84.1           | 15.9       |
| <b>Path 9</b> | -224.5                  | 62.4                      | -241.0                     | -45.9                  | 84.0           | 16.0       |
|               | <i>0.0</i>              | <i>2.0</i>                | <i>8.0</i>                 | <i>6.8</i>             | <i>2.3</i>     | <i>2.3</i> |

**Be<sub>2</sub>O<sub>2</sub>**

| <i>paths</i>  | $\Delta E_{\text{int}}$ | $\Delta E_{\text{Pauli}}$ | $\Delta E_{\text{elstat}}$ | $\Delta E_{\text{oi}}$ | <i>%elstat</i> | <i>%oi</i> |
|---------------|-------------------------|---------------------------|----------------------------|------------------------|----------------|------------|
| <b>Path 1</b> | -2033.5                 | 402.4                     | -2067.0                    | -368.9                 | 84.9           | 15.1       |
| <b>Path 2</b> | -2033.5                 | 487.2                     | -1934.4                    | -586.4                 | 76.7           | 23.3       |
| <b>Path 3</b> | -2033.5                 | 279.7                     | -1773.9                    | -539.4                 | 76.7           | 23.3       |
| <b>Path 4</b> | -2033.5                 | 467.9                     | -1913.1                    | -588.3                 | 76.5           | 23.5       |
| <b>Path 5</b> | -2033.5                 | 480.5                     | -1914.4                    | -599.6                 | 76.1           | 23.9       |
| <b>Path 6</b> | -2033.5                 | 428.0                     | -1978.7                    | -482.8                 | 80.4           | 19.6       |
| <b>Path 7</b> | -2033.5                 | 403.2                     | -2065.2                    | -371.5                 | 84.8           | 15.2       |
| <b>Path 8</b> | -2033.5                 | 341.6                     | -1698.4                    | -676.8                 | 71.5           | 28.5       |
| <b>Path 9</b> | -2033.5                 | 244.9                     | -1638.5                    | -640.0                 | 71.9           | 28.1       |
|               | 0.0                     | 71.6                      | 101.4                      | 100.4                  | 4.8            | 4.8        |

**Be<sub>2</sub>S<sub>2</sub>**

| <i>paths</i>  | $\Delta E_{\text{int}}$ | $\Delta E_{\text{Pauli}}$ | $\Delta E_{\text{elstat}}$ | $\Delta E_{\text{oi}}$ | <i>%elstat</i> | <i>%oi</i> |
|---------------|-------------------------|---------------------------|----------------------------|------------------------|----------------|------------|
| <b>Path 1</b> | -1693.9                 | 312.9                     | -1405.5                    | -601.3                 | 70.0           | 30.0       |
| <b>Path 2</b> | -1693.9                 | 396.6                     | -1417.0                    | -673.5                 | 67.8           | 32.2       |
| <b>Path 3</b> | -1693.9                 | 173.9                     | -1052.4                    | -815.4                 | 56.3           | 43.7       |
| <b>Path 4</b> | -1693.9                 | 360.4                     | -1347.1                    | -707.3                 | 65.6           | 34.4       |
| <b>Path 5</b> | -1693.9                 | 368.4                     | -1240.8                    | -821.5                 | 60.2           | 39.8       |
| <b>Path 6</b> | -1693.9                 | 341.1                     | -1415.2                    | -619.8                 | 69.5           | 30.5       |
| <b>Path 7</b> | -1693.9                 | 313.4                     | -1405.0                    | -602.2                 | 70.0           | 30.0       |
| <b>Path 8</b> | -1693.9                 | 263.0                     | -1292.3                    | -664.6                 | 66.0           | 34.0       |
| <b>Path 9</b> | -1693.9                 | 164.4                     | -1212.2                    | -646.2                 | 65.2           | 34.8       |
|               | 0.0                     | 72.6                      | 136.2                      | 94.9                   | 4.7            | 4.7        |

**Be<sub>2</sub>Se<sub>2</sub>**

| <i>paths</i>  | $\Delta E_{\text{int}}$ | $\Delta E_{\text{Pauli}}$ | $\Delta E_{\text{elstat}}$ | $\Delta E_{\text{oi}}$ | <i>%elstat</i> | <i>%oi</i> |
|---------------|-------------------------|---------------------------|----------------------------|------------------------|----------------|------------|
| <b>Path 1</b> | -1640.9                 | 282.6                     | -1283.0                    | -640.5                 | 66.7           | 33.3       |
| <b>Path 2</b> | -1640.9                 | 379.9                     | -1324.7                    | -696.0                 | 65.6           | 34.4       |
| <b>Path 3</b> | -1640.9                 | 141.5                     | -907.9                     | -874.5                 | 50.9           | 49.1       |
| <b>Path 4</b> | -1640.8                 | 332.2                     | -1240.9                    | -732.2                 | 62.9           | 37.1       |
| <b>Path 5</b> | -1640.9                 | 337.4                     | -1114.9                    | -863.4                 | 56.4           | 43.6       |
| <b>Path 6</b> | -1640.9                 | 318.4                     | -1312.5                    | -646.8                 | 67.0           | 33.0       |
| <b>Path 7</b> | -1640.9                 | 282.9                     | -1282.7                    | -641.1                 | 66.7           | 33.3       |
| <b>Path 8</b> | -1640.9                 | 241.8                     | -1203.1                    | -679.6                 | 63.9           | 36.1       |
| <b>Path 9</b> | -1640.9                 | 139.4                     | -1112.0                    | -668.2                 | 62.5           | 37.5       |
|               | 0.0                     | 76.1                      | 150.3                      | 102.2                  | 5.5            | 5.5        |

**Be<sub>2</sub>Te<sub>2</sub>**

| <i>paths</i>  | $\Delta E_{\text{int}}$ | $\Delta E_{\text{Pauli}}$ | $\Delta E_{\text{elstat}}$ | $\Delta E_{\text{oi}}$ | <i>%elstat</i> | <i>%oi</i> |
|---------------|-------------------------|---------------------------|----------------------------|------------------------|----------------|------------|
| <b>Path 1</b> | -1561.3                 | 247.0                     | -1099.1                    | -709.1                 | 60.8           | 39.2       |
| <b>Path 2</b> | -1561.3                 | 352.7                     | -1180.4                    | -733.6                 | 61.7           | 38.3       |
| <b>Path 3</b> | -1561.3                 | 112.9                     | -726.5                     | -947.7                 | 43.4           | 56.6       |
| <b>Path 4</b> | -1561.2                 | 295.6                     | -1082.1                    | -774.7                 | 58.3           | 41.7       |
| <b>Path 5</b> | -1561.2                 | 298.1                     | -927.5                     | -931.8                 | 49.9           | 50.1       |
| <b>Path 6</b> | -1561.2                 | 288.7                     | -1157.5                    | -692.4                 | 62.6           | 37.4       |
| <b>Path 7</b> | -1561.3                 | 247.2                     | -1098.9                    | -709.5                 | 60.8           | 39.2       |
| <b>Path 8</b> | -1561.3                 | 214.5                     | -1070.3                    | -705.4                 | 60.3           | 39.7       |
| <b>Path 9</b> | -1561.3                 | 114.7                     | -980.2                     | -695.8                 | 58.5           | 41.5       |
|               | 0.0                     | 75.3                      | 159.8                      | 108.6                  | 6.4            | 6.4        |

**Mg<sub>2</sub>O<sub>2</sub>**

| <i>paths</i>  | $\Delta E_{\text{int}}$ | $\Delta E_{\text{Pauli}}$ | $\Delta E_{\text{elstat}}$ | $\Delta E_{\text{oi}}$ | <i>%elstat</i> | <i>%oi</i> |
|---------------|-------------------------|---------------------------|----------------------------|------------------------|----------------|------------|
| <b>Path 1</b> | -1691.0                 | 305.7                     | -1831.0                    | -165.7                 | 91.7           | 8.3        |
| <b>Path 2</b> | -1691.0                 | 346.8                     | -1619.4                    | -418.4                 | 79.5           | 20.5       |
| <b>Path 3</b> | -1691.0                 | 255.0                     | -1694.6                    | -251.4                 | 87.1           | 12.9       |
| <b>Path 4</b> | -1691.0                 | 336.1                     | -1635.6                    | -391.4                 | 80.7           | 19.3       |
| <b>Path 5</b> | -1691.0                 | 351.8                     | -1704.9                    | -337.9                 | 83.5           | 16.5       |
| <b>Path 6</b> | -1691.0                 | 311.4                     | -1684.6                    | -317.8                 | 84.1           | 15.9       |
| <b>Path 7</b> | -1691.0                 | 305.7                     | -1823.9                    | -172.8                 | 91.3           | 8.7        |
| <b>Path 8</b> | -1691.0                 | 253.6                     | -1475.5                    | -469.1                 | 75.9           | 24.1       |
| <b>Path 9</b> | -1691.0                 | 207.2                     | -1483.8                    | -414.5                 | 78.2           | 21.8       |
|               | 0.0                     | 33.1                      | 83.8                       | 100.3                  | 5.6            | 5.6        |

**Mg<sub>2</sub>S<sub>2</sub>**

| <i>paths</i>  | $\Delta E_{\text{int}}$ | $\Delta E_{\text{Pauli}}$ | $\Delta E_{\text{elstat}}$ | $\Delta E_{\text{oi}}$ | <i>%elstat</i> | <i>%oi</i> |
|---------------|-------------------------|---------------------------|----------------------------|------------------------|----------------|------------|
| <b>Path 1</b> | -1399.5                 | 267.2                     | -1396.7                    | -269.9                 | 83.8           | 16.2       |
| <b>Path 2</b> | -1399.5                 | 307.7                     | -1277.2                    | -430.0                 | 74.8           | 25.2       |
| <b>Path 3</b> | -1399.5                 | 183.0                     | -1190.1                    | -392.4                 | 75.2           | 24.8       |
| <b>Path 4</b> | -1399.5                 | 294.7                     | -1265.1                    | -429.1                 | 74.7           | 25.3       |
| <b>Path 5</b> | -1399.5                 | 313.1                     | -1266.5                    | -446.0                 | 74.0           | 26.0       |
| <b>Path 6</b> | -1399.5                 | 275.2                     | -1313.8                    | -360.8                 | 78.5           | 21.5       |
| <b>Path 7</b> | -1399.5                 | 267.2                     | -1394.1                    | -272.6                 | 83.6           | 16.4       |
| <b>Path 8</b> | -1399.5                 | 230.4                     | -1217.1                    | -412.7                 | 74.7           | 25.3       |
| <b>Path 9</b> | -1399.5                 | 163.1                     | -1194.9                    | -367.7                 | 76.5           | 23.5       |
|               | 0.0                     | 43.7                      | 74.5                       | 74.1                   | 3.9            | 3.9        |

**Mg<sub>2</sub>Se<sub>2</sub>**

| <i>paths</i>  | $\Delta E_{\text{int}}$ | $\Delta E_{\text{Pauli}}$ | $\Delta E_{\text{elstat}}$ | $\Delta E_{\text{oi}}$ | <i>%elstat</i> | <i>%oi</i> |
|---------------|-------------------------|---------------------------|----------------------------|------------------------|----------------|------------|
| <b>Path 1</b> | -1359.5                 | 249.3                     | -1303.6                    | -305.2                 | 81.0           | 19.0       |
| <b>Path 2</b> | -1359.5                 | 298.9                     | -1208.1                    | -450.3                 | 72.8           | 27.2       |
| <b>Path 3</b> | -1359.5                 | 156.4                     | -1056.9                    | -459.0                 | 69.7           | 30.3       |
| <b>Path 4</b> | -1359.5                 | 280.8                     | -1184.7                    | -455.6                 | 72.2           | 27.8       |
| <b>Path 5</b> | -1359.5                 | 297.4                     | -1171.0                    | -485.8                 | 70.7           | 29.3       |
| <b>Path 6</b> | -1359.5                 | 263.4                     | -1235.8                    | -387.1                 | 76.1           | 23.9       |
| <b>Path 7</b> | -1359.5                 | 249.4                     | -1301.5                    | -307.4                 | 80.9           | 19.1       |
| <b>Path 8</b> | -1359.5                 | 218.5                     | -1147.5                    | -430.5                 | 72.7           | 27.3       |
| <b>Path 9</b> | -1359.5                 | 144.0                     | -1105.1                    | -398.3                 | 73.5           | 26.5       |
|               | 0.0                     | 48.7                      | 85.1                       | 75.1                   | 4.1            | 4.1        |

**Ba<sub>2</sub>O<sub>2</sub>**

| <i>paths</i>  | $\Delta E_{\text{int}}$ | $\Delta E_{\text{Pauli}}$ | $\Delta E_{\text{elstat}}$ | $\Delta E_{\text{oi}}$ | <i>%elstat</i> | <i>%oi</i> |
|---------------|-------------------------|---------------------------|----------------------------|------------------------|----------------|------------|
| <b>Path 1</b> | -1429.3                 | 601.1                     | -1741.9                    | -288.6                 | 85.8           | 14.2       |
| <b>Path 2</b> | -1429.3                 | 560.0                     | -1504.8                    | -484.5                 | 75.6           | 24.4       |
| <b>Path 3</b> | -1429.3                 | 575.0                     | -1595.6                    | -408.8                 | 79.6           | 20.4       |
| <b>Path 4</b> | -1429.3                 | 590.1                     | -1554.7                    | -464.8                 | 77.0           | 23.0       |
| <b>Path 5</b> | -1429.3                 | 625.4                     | -1646.3                    | -408.4                 | 80.1           | 19.9       |
| <b>Path 6</b> | -1429.3                 | 582.8                     | -1595.9                    | -416.3                 | 79.3           | 20.7       |
| <b>Path 7</b> | -1429.3                 | 607.3                     | -1673.4                    | -363.2                 | 82.2           | 17.8       |
| <b>Path 8</b> | -1429.3                 | 488.9                     | -1236.3                    | -681.9                 | 64.5           | 35.5       |
| <b>Path 9</b> | -1429.3                 | 462.6                     | -1213.9                    | -678.1                 | 64.2           | 35.8       |
|               | 0.0                     | 21.7                      | 78.5                       | 65.0                   | 7.5            | 7.5        |

**Ba<sub>2</sub>Se<sub>2</sub>**

| <i>paths</i>  | $\Delta E_{\text{int}}$ | $\Delta E_{\text{Pauli}}$ | $\Delta E_{\text{elstat}}$ | $\Delta E_{\text{oi}}$ | <i>%elstat</i> | <i>%oi</i> |
|---------------|-------------------------|---------------------------|----------------------------|------------------------|----------------|------------|
| <b>Path 1</b> | -1080.2                 | 478.4                     | -1351.3                    | -207.2                 | 86.7           | 13.3       |
| <b>Path 2</b> | -1080.2                 | 395.9                     | -1132.1                    | -344.0                 | 76.7           | 23.3       |
| <b>Path 3</b> | -1080.2                 | 389.1                     | -1153.5                    | -315.8                 | 78.5           | 21.5       |
| <b>Path 4</b> | -1080.2                 | 434.7                     | -1183.6                    | -331.3                 | 78.1           | 21.9       |
| <b>Path 5</b> | -1080.2                 | 481.6                     | -1255.0                    | -306.8                 | 80.4           | 19.6       |
| <b>Path 6</b> | -1080.2                 | 434.1                     | -1214.7                    | -299.6                 | 80.2           | 19.8       |
| <b>Path 7</b> | -1080.2                 | 477.5                     | -1326.0                    | -231.7                 | 85.1           | 14.9       |
| <b>Path 8</b> | -1080.2                 | 374.4                     | -1092.7                    | -361.9                 | 75.1           | 24.9       |
| <b>Path 9</b> | -1080.2                 | 329.8                     | -1055.3                    | -354.7                 | 74.8           | 25.2       |
|               | 0.0                     | 39.2                      | 84.1                       | 51.5                   | 4.1            | 4.1        |



**Ba<sub>2</sub>Te<sub>2</sub>**

| <i>paths</i>  | $\Delta E_{\text{int}}$ | $\Delta E_{\text{Pauli}}$ | $\Delta E_{\text{elstat}}$ | $\Delta E_{\text{oi}}$ | <i>%elstat</i> | <i>%oi</i> |
|---------------|-------------------------|---------------------------|----------------------------|------------------------|----------------|------------|
| <b>Path 1</b> | -1011.3                 | 428.0                     | -1232.1                    | -207.3                 | 85.6           | 14.4       |
| <b>Path 2</b> | -1011.3                 | 349.8                     | -1033.4                    | -327.8                 | 75.9           | 24.1       |
| <b>Path 3</b> | -1011.3                 | 334.8                     | -1026.4                    | -319.7                 | 76.3           | 23.7       |
| <b>Path 4</b> | -1011.3                 | 385.1                     | -1076.2                    | -320.2                 | 77.1           | 22.9       |
| <b>Path 5</b> | -1011.3                 | 429.3                     | -1134.6                    | -306.0                 | 78.8           | 21.2       |
| <b>Path 6</b> | -1011.3                 | 383.7                     | -1106.9                    | -288.1                 | 79.3           | 20.7       |
| <b>Path 7</b> | -1011.3                 | 427.1                     | -1213.4                    | -225.0                 | 84.4           | 15.6       |
| <b>Path 8</b> | -1011.3                 | 331.8                     | -1009.3                    | -333.9                 | 75.1           | 24.9       |
| <b>Path 9</b> | -1011.3                 | 286.4                     | -970.0                     | -327.8                 | 74.7           | 25.3       |
|               | 0.0                     | 38.9                      | 81.4                       | 48.9                   | 3.9            | 3.9        |

**B<sub>2</sub>N<sub>2</sub>**

| <i>paths</i>  | $\Delta E_{\text{int}}$ | $\Delta E_{\text{Pauli}}$ | $\Delta E_{\text{elstat}}$ | $\Delta E_{\text{oi}}$ | <i>%elstat</i> | <i>%oi</i> |
|---------------|-------------------------|---------------------------|----------------------------|------------------------|----------------|------------|
| <b>Path 1</b> | -4846.9                 | 1907.6                    | -4867.2                    | -1887.3                | 72.1           | 27.9       |
| <b>Path 2</b> | -4846.9                 | 1346.3                    | -3670.7                    | -2522.5                | 59.3           | 40.7       |
| <b>Path 3</b> | -4846.9                 | 1392.6                    | -3770.7                    | -2468.8                | 60.4           | 39.6       |
| <b>Path 4</b> | -4846.9                 | 1733.8                    | -3850.4                    | -2730.3                | 58.5           | 41.5       |
| <b>Path 5</b> | -4846.9                 | 1789.0                    | -4528.1                    | -2107.8                | 68.2           | 31.8       |
| <b>Path 6</b> | -4846.9                 | 1616.7                    | -4027.3                    | -2436.3                | 62.3           | 37.7       |
| <b>Path 7</b> | -4846.9                 | 1907.6                    | -4866.4                    | -1888.1                | 72.0           | 28.0       |
| <b>Path 8</b> | -4846.9                 | 1548.3                    | -3071.4                    | -3323.9                | 48.0           | 52.0       |
| <b>Path 9</b> | -4846.9                 | 1364.5                    | -2685.2                    | -3526.2                | 43.2           | 56.8       |
|               | 0.0                     | 229.4                     | 517.8                      | 331.2                  | 9.9            | 9.9        |

**B<sub>2</sub>P<sub>2</sub>**

| <i>paths</i>  | $\Delta E_{\text{int}}$ | $\Delta E_{\text{Pauli}}$ | $\Delta E_{\text{elstat}}$ | $\Delta E_{\text{oi}}$ | <i>%elstat</i> | <i>%oi</i> |
|---------------|-------------------------|---------------------------|----------------------------|------------------------|----------------|------------|
| <b>Path 1</b> | -4237.0                 | 613.1                     | -2266.3                    | -2583.7                | 46.7           | 53.3       |
| <b>Path 2</b> | -4237.0                 | 899.3                     | -2733.4                    | -2402.8                | 53.2           | 46.8       |
| <b>Path 3</b> | -4237.0                 | 200.9                     | -1205.3                    | -3232.6                | 27.2           | 72.8       |
| <b>Path 4</b> | -4237.0                 | 681.1                     | -2465.5                    | -2452.6                | 50.1           | 49.9       |
| <b>Path 5</b> | -4237.0                 | 674.0                     | -1798.1                    | -3112.9                | 36.6           | 63.4       |
| <b>Path 6</b> | -4237.0                 | 690.1                     | -2634.7                    | -2292.3                | 53.5           | 46.5       |
| <b>Path 7</b> | -4237.0                 | 613.4                     | -2266.2                    | -2584.2                | 46.7           | 53.3       |
| <b>Path 8</b> | -4237.0                 | 478.1                     | -2424.1                    | -2291.0                | 51.4           | 48.6       |
| <b>Path 9</b> | -4237.0                 | 213.4                     | -2192.3                    | -2258.0                | 49.3           | 50.7       |
|               | 0.0                     | 210.2                     | 532.9                      | 362.5                  | 8.7            | 8.7        |

**B<sub>2</sub>As<sub>2</sub>**

| <i>paths</i>  | $\Delta E_{\text{int}}$ | $\Delta E_{\text{Pauli}}$ | $\Delta E_{\text{elstat}}$ | $\Delta E_{\text{oi}}$ | <i>%elstat</i> | <i>%oi</i> |
|---------------|-------------------------|---------------------------|----------------------------|------------------------|----------------|------------|
| <b>Path 1</b> | -4194.1                 | 633.6                     | -2587.2                    | -2240.5                | 53.6           | 46.4       |
| <b>Path 2</b> | -4194.1                 | 777.6                     | -2653.1                    | -2318.6                | 53.4           | 46.6       |
| <b>Path 3</b> | -4194.1                 | 192.5                     | -1555.4                    | -2831.2                | 35.5           | 64.5       |
| <b>Path 4</b> | -4194.1                 | 668.7                     | -2332.6                    | -2530.2                | 48.0           | 52.0       |
| <b>Path 5</b> | -4194.1                 | 703.3                     | -2133.2                    | -2764.3                | 43.6           | 56.4       |
| <b>Path 6</b> | -4194.1                 | 746.8                     | -2516.7                    | -2424.3                | 50.9           | 49.1       |
| <b>Path 7</b> | -4194.1                 | 633.7                     | -2587.1                    | -2240.7                | 53.6           | 46.4       |
| <b>Path 8</b> | -4194.1                 | 578.7                     | -2396.8                    | -2376.0                | 50.2           | 49.8       |
| <b>Path 9</b> | -4194.1                 | 181.2                     | -2150.8                    | -2224.5                | 49.2           | 50.8       |
|               | 0.0                     | 197.2                     | 389.4                      | 241.7                  | 5.9            | 5.9        |

**B<sub>2</sub>Sb<sub>2</sub>**

| <i>paths</i>  | $\Delta E_{\text{int}}$ | $\Delta E_{\text{Pauli}}$ | $\Delta E_{\text{elstat}}$ | $\Delta E_{\text{oi}}$ | <i>%elstat</i> | <i>%oi</i> |
|---------------|-------------------------|---------------------------|----------------------------|------------------------|----------------|------------|
| <b>Path 1</b> | -4029.3                 | 534.5                     | -1816.2                    | -2747.6                | 39.8           | 60.2       |
| <b>Path 2</b> | -4029.3                 | 739.5                     | -2307.8                    | -2460.9                | 48.4           | 51.6       |
| <b>Path 3</b> | -4029.3                 | 151.0                     | -838.8                     | -3341.5                | 20.1           | 79.9       |
| <b>Path 4</b> | -4029.3                 | 723.2                     | -2165.0                    | -2587.5                | 45.6           | 54.4       |
| <b>Path 5</b> | -4029.3                 | 716.2                     | -1474.6                    | -3270.9                | 31.1           | 68.9       |
| <b>Path 6</b> | -4029.3                 | 578.7                     | -2229.4                    | -2378.7                | 48.4           | 51.6       |
| <b>Path 7</b> | -4029.3                 | 534.7                     | -1816.2                    | -2747.8                | 39.8           | 60.2       |
| <b>Path 8</b> | -4031.5                 | 390.3                     | -2053.1                    | -2368.7                | 46.4           | 53.6       |
| <b>Path 9</b> | -4031.5                 | 163.6                     | -1841.5                    | -2353.6                | 43.9           | 56.1       |
|               | 1.0                     | 204.8                     | 517.3                      | 378.0                  | 9.4            | 9.4        |

**Ga<sub>2</sub>N<sub>2</sub>**

| <i>paths</i>  | $\Delta E_{\text{int}}$ | $\Delta E_{\text{Pauli}}$ | $\Delta E_{\text{elstat}}$ | $\Delta E_{\text{oi}}$ | <i>%elstat</i> | <i>%oi</i> |
|---------------|-------------------------|---------------------------|----------------------------|------------------------|----------------|------------|
| <b>Path 1</b> | -4137.2                 | 920.3                     | -4291.5                    | -766.0                 | 84.9           | 15.1       |
| <b>Path 2</b> | -4137.2                 | 818.7                     | -3451.2                    | -1504.7                | 69.6           | 30.4       |
| <b>Path 3</b> | -4137.2                 | 606.9                     | -3654.0                    | -1090.0                | 77.0           | 23.0       |
| <b>Path 4</b> | -4137.2                 | 906.6                     | -3557.6                    | -1486.2                | 70.5           | 29.5       |
| <b>Path 5</b> | -4137.2                 | 1020.7                    | -4022.8                    | -1135.1                | 78.0           | 22.0       |
| <b>Path 6</b> | -4137.2                 | 837.3                     | -3671.5                    | -1303.1                | 73.8           | 26.2       |
| <b>Path 7</b> | -4137.2                 | 919.2                     | -4263.5                    | -792.9                 | 84.3           | 15.7       |
| <b>Path 8</b> | -4137.2                 | 751.5                     | -3110.7                    | -1777.9                | 63.6           | 36.4       |
| <b>Path 9</b> | -4137.2                 | 499.2                     | -2942.2                    | -1694.2                | 63.5           | 36.5       |
|               | 0.0                     | 130.0                     | 344.1                      | 300.3                  | 7.9            | 7.9        |

**Ga<sub>2</sub>P<sub>2</sub>**

| <i>paths</i>  | $\Delta E_{\text{int}}$ | $\Delta E_{\text{Pauli}}$ | $\Delta E_{\text{elstat}}$ | $\Delta E_{\text{oi}}$ | <i>%elstat</i> | <i>%oi</i> |
|---------------|-------------------------|---------------------------|----------------------------|------------------------|----------------|------------|
| <b>Path 1</b> | -3511.7                 | 686.8                     | -3051.6                    | -1147.0                | 72.7           | 27.3       |
| <b>Path 2</b> | -3511.7                 | 620.1                     | -2579.2                    | -1552.6                | 62.4           | 37.6       |
| <b>Path 3</b> | -3511.7                 | 310.3                     | -2250.3                    | -1571.7                | 58.9           | 41.1       |
| <b>Path 4</b> | -3511.7                 | 716.3                     | -2583.2                    | -1644.7                | 61.1           | 38.9       |
| <b>Path 5</b> | -3511.7                 | 792.4                     | -2681.6                    | -1622.6                | 62.3           | 37.7       |
| <b>Path 6</b> | -3511.7                 | 640.9                     | -2706.8                    | -1445.7                | 65.2           | 34.8       |
| <b>Path 7</b> | -3511.7                 | 687.4                     | -3043.4                    | -1155.7                | 72.5           | 27.5       |
| <b>Path 8</b> | -3511.7                 | 496.8                     | -2347.9                    | -1660.5                | 58.6           | 41.4       |
| <b>Path 9</b> | -3511.7                 | 235.4                     | -2190.6                    | -1556.5                | 58.5           | 41.5       |
|               | 0.0                     | 154.1                     | 280.6                      | 212.7                  | 5.6            | 5.6        |

**Ga<sub>2</sub>As<sub>2</sub>**

| <i>paths</i>  | $\Delta E_{\text{int}}$ | $\Delta E_{\text{Pauli}}$ | $\Delta E_{\text{elstat}}$ | $\Delta E_{\text{oi}}$ | <i>%elstat</i> | <i>%oi</i> |
|---------------|-------------------------|---------------------------|----------------------------|------------------------|----------------|------------|
| <b>Path 1</b> | -3497.9                 | 638.4                     | -2975.1                    | -1161.1                | 71.9           | 28.1       |
| <b>Path 2</b> | -3497.9                 | 516.1                     | -2430.4                    | -1583.6                | 60.5           | 39.5       |
| <b>Path 3</b> | -3497.9                 | 277.2                     | -2202.9                    | -1572.2                | 58.4           | 41.6       |
| <b>Path 4</b> | -3497.9                 | 660.8                     | -2391.1                    | -1767.5                | 57.5           | 42.5       |
| <b>Path 5</b> | -3497.9                 | 742.5                     | -2584.1                    | -1656.3                | 60.9           | 39.1       |
| <b>Path 6</b> | -3497.9                 | 583.2                     | -2521.1                    | -1560.0                | 61.8           | 38.2       |
| <b>Path 7</b> | -3497.9                 | 638.3                     | -2967.1                    | -1169.1                | 71.7           | 28.3       |
| <b>Path 8</b> | -3497.9                 | 492.4                     | -2319.1                    | -1671.1                | 58.1           | 41.9       |
| <b>Path 9</b> | -3497.9                 | 235.8                     | -2191.1                    | -1542.6                | 58.7           | 41.3       |
|               | 0.0                     | 150.3                     | 291.5                      | 236.7                  | 5.7            | 5.7        |

**In<sub>2</sub>N<sub>2</sub>**

| <i>paths</i>  | $\Delta E_{\text{int}}$ | $\Delta E_{\text{Pauli}}$ | $\Delta E_{\text{elstat}}$ | $\Delta E_{\text{oi}}$ | <i>%elstat</i> | <i>%oi</i> |
|---------------|-------------------------|---------------------------|----------------------------|------------------------|----------------|------------|
| <b>Path 1</b> | -3959.5                 | 1941.7                    | -3532.5                    | -2368.7                | 59.9           | 40.1       |
| <b>Path 2</b> | -3959.5                 | 1414.4                    | -2936.1                    | -2437.9                | 54.6           | 45.4       |
| <b>Path 3</b> | -3959.5                 | 1647.1                    | -2983.6                    | -2623.0                | 53.2           | 46.8       |
| <b>Path 4</b> | -3969.0                 | 1793.3                    | -3191.8                    | -2570.5                | 55.4           | 44.6       |
| <b>Path 5</b> | -3959.5                 | 1848.3                    | -3728.4                    | -2079.4                | 64.2           | 35.8       |
| <b>Path 6</b> | -3959.5                 | 1631.8                    | -3169.6                    | -2421.7                | 56.7           | 43.3       |
| <b>Path 7</b> | -3959.5                 | 1935.9                    | -3495.2                    | -2400.2                | 59.3           | 40.7       |
| <b>Path 8</b> | -3959.5                 | 1543.6                    | -2491.8                    | -3011.3                | 45.3           | 54.7       |
| <b>Path 9</b> | -3959.5                 | 1606.8                    | -2039.1                    | -3527.2                | 36.6           | 63.4       |
|               | 3.2                     | 191.4                     | 299.0                      | 174.6                  | 8.3            | 8.3        |

**In<sub>2</sub>P<sub>2</sub>**

| <i>paths</i>  | $\Delta E_{\text{int}}$ | $\Delta E_{\text{Pauli}}$ | $\Delta E_{\text{elstat}}$ | $\Delta E_{\text{oi}}$ | <i>%elstat</i> | <i>%oi</i> |
|---------------|-------------------------|---------------------------|----------------------------|------------------------|----------------|------------|
| <b>Path 1</b> | -3242.3                 | 749.2                     | -3066.5                    | -925.0                 | 76.8           | 23.2       |
| <b>Path 2</b> | -3242.3                 | 566.1                     | -2427.5                    | -1380.9                | 63.7           | 36.3       |
| <b>Path 3</b> | -3242.3                 | 396.6                     | -2358.3                    | -1280.6                | 64.8           | 35.2       |
| <b>Path 4</b> | -3242.3                 | 731.2                     | -2460.3                    | -1513.2                | 61.9           | 38.1       |
| <b>Path 5</b> | -3242.3                 | 847.9                     | -2708.2                    | -1382.0                | 66.2           | 33.8       |
| <b>Path 6</b> | -3242.3                 | 662.9                     | -2572.2                    | -1333.0                | 65.9           | 34.1       |
| <b>Path 7</b> | -3242.3                 | 746.8                     | -3042.9                    | -946.2                 | 76.3           | 23.7       |
| <b>Path 8</b> | -3242.3                 | 560.9                     | -2337.7                    | -1465.5                | 61.5           | 38.5       |
| <b>Path 9</b> | -3242.3                 | 316.6                     | -2223.9                    | -1335.0                | 62.5           | 37.5       |
|               | 0.0                     | 149.0                     | 290.6                      | 227.1                  | 5.9            | 5.9        |

**In<sub>2</sub>As<sub>2</sub>**

| <i>paths</i>  | $\Delta E_{\text{int}}$ | $\Delta E_{\text{Pauli}}$ | $\Delta E_{\text{elstat}}$ | $\Delta E_{\text{oi}}$ | <i>%elstat</i> | <i>%oi</i> |
|---------------|-------------------------|---------------------------|----------------------------|------------------------|----------------|------------|
| <b>Path 1</b> | -3232.3                 | 695.4                     | -2980.5                    | -947.2                 | 75.9           | 24.1       |
| <b>Path 2</b> | -3232.3                 | 533.8                     | -2366.4                    | -1399.7                | 62.8           | 37.2       |
| <b>Path 3</b> | -3232.3                 | 365.3                     | -2299.8                    | -1297.9                | 63.9           | 36.1       |
| <b>Path 4</b> | -3232.3                 | 680.9                     | -2373.0                    | -1540.2                | 60.6           | 39.4       |
| <b>Path 5</b> | -3232.3                 | 788.1                     | -2609.1                    | -1411.3                | 64.9           | 35.1       |
| <b>Path 6</b> | -3232.3                 | 619.2                     | -2494.3                    | -1357.2                | 64.8           | 35.2       |
| <b>Path 7</b> | -3232.3                 | 692.6                     | -2957.9                    | -967.0                 | 75.4           | 24.6       |
| <b>Path 8</b> | -3232.3                 | 494.7                     | -2216.0                    | -1510.9                | 59.5           | 40.5       |
| <b>Path 9</b> | -3232.3                 | 265.9                     | -2119.7                    | -1378.5                | 60.6           | 39.4       |
|               | 0.0                     | 138.5                     | 282.4                      | 228.8                  | 6.1            | 6.1        |

**Tl<sub>2</sub>N<sub>2</sub>**

| <i>paths</i>  | $\Delta E_{\text{int}}$ | $\Delta E_{\text{Pauli}}$ | $\Delta E_{\text{elstat}}$ | $\Delta E_{\text{oi}}$ | <i>%elstat</i> | <i>%oi</i> |
|---------------|-------------------------|---------------------------|----------------------------|------------------------|----------------|------------|
| <b>Path 1</b> | -4093.7                 | 1968.9                    | -3289.6                    | -2773.0                | 54.3           | 45.7       |
| <b>Path 2</b> | -4093.7                 | 1448.4                    | -2805.2                    | -2736.9                | 50.6           | 49.4       |
| <b>Path 3</b> | -4093.7                 | 1719.1                    | -2809.6                    | -3003.2                | 48.3           | 51.7       |
| <b>Path 4</b> | -4093.7                 | 1802.8                    | -3072.5                    | -2824.0                | 52.1           | 47.9       |
| <b>Path 5</b> | -4093.7                 | 1845.8                    | -3573.7                    | -2365.8                | 60.2           | 39.8       |
| <b>Path 6</b> | -4093.7                 | 1644.4                    | -3013.6                    | -2724.5                | 52.5           | 47.5       |
| <b>Path 7</b> | -4093.7                 | 1962.3                    | -3243.4                    | -2812.6                | 53.6           | 46.4       |
| <b>Path 8</b> | -4093.7                 | 1568.4                    | -2365.7                    | -3296.4                | 41.8           | 58.2       |
| <b>Path 9</b> | -4093.7                 | 1686.2                    | -1895.3                    | -3884.6                | 32.8           | 67.2       |
|               | 0.0                     | 184.9                     | 276.5                      | 192.5                  | 8.0            | 8.0        |

**Tl<sub>2</sub>As<sub>2</sub>**

| <i>paths</i>  | $\Delta E_{\text{int}}$ | $\Delta E_{\text{Pauli}}$ | $\Delta E_{\text{elstat}}$ | $\Delta E_{\text{oi}}$ | <i>%elstat</i> | <i>%oi</i> |
|---------------|-------------------------|---------------------------|----------------------------|------------------------|----------------|------------|
| <b>Path 1</b> | -3338.6                 | 934.7                     | -3254.8                    | -1018.5                | 76.2           | 23.8       |
| <b>Path 2</b> | -3338.6                 | 600.3                     | -2433.3                    | -1505.5                | 61.8           | 38.2       |
| <b>Path 3</b> | -3338.6                 | 509.0                     | -2489.6                    | -1357.9                | 64.7           | 35.3       |
| <b>Path 4</b> | -3338.6                 | 845.9                     | -2558.3                    | -1612.1                | 61.3           | 38.7       |
| <b>Path 5</b> | -3338.6                 | 977.9                     | -2967.5                    | -1334.9                | 69.0           | 31.0       |
| <b>Path 6</b> | -3338.6                 | 755.8                     | -2652.4                    | -1442.0                | 64.8           | 35.2       |
| <b>Path 7</b> | -3338.6                 | 929.7                     | -3227.7                    | -1040.5                | 75.6           | 24.4       |
| <b>Path 8</b> | -3338.6                 | 660.1                     | -2378.2                    | -1620.4                | 59.5           | 40.5       |
| <b>Path 9</b> | -3338.6                 | 412.2                     | -2181.7                    | -1569.1                | 58.2           | 41.8       |
|               | 0.0                     | 180.2                     | 348.5                      | 225.3                  | 6.6            | 6.6        |

**Ag<sub>2</sub>Cl<sub>2</sub>**

| <i>paths</i>  | $\Delta E_{\text{int}}$ | $\Delta E_{\text{Pauli}}$ | $\Delta E_{\text{elstat}}$ | $\Delta E_{\text{oi}}$ | <i>%elstat</i> | <i>%oi</i> |
|---------------|-------------------------|---------------------------|----------------------------|------------------------|----------------|------------|
| <b>Path 1</b> | -381.5                  | 182.2                     | -456.4                     | -107.4                 | 80.9           | 19.1       |
| <b>Path 2</b> | -381.5                  | 205.9                     | -431.2                     | -156.3                 | 73.4           | 26.6       |
| <b>Path 3</b> | -381.5                  | 182.0                     | -420.6                     | -143.0                 | 74.6           | 25.4       |
| <b>Path 4</b> | -381.5                  | 204.6                     | -428.9                     | -157.3                 | 73.2           | 26.8       |
| <b>Path 5</b> | -381.6                  | 213.1                     | -426.5                     | -168.1                 | 71.7           | 28.3       |
| <b>Path 6</b> | -381.5                  | 191.2                     | -438.4                     | -134.4                 | 76.5           | 23.5       |
| <b>Path 7</b> | -381.6                  | 192.8                     | -446.9                     | -127.4                 | 77.8           | 22.2       |
| <b>Path 8</b> | -381.5                  | 177.7                     | -414.5                     | -144.7                 | 74.1           | 25.9       |
| <b>Path 9</b> | -381.5                  | 162.4                     | -416.0                     | -127.9                 | 76.5           | 23.5       |
|               | 0.0                     | 12.1                      | 12.5                       | 20.8                   | 2.8            | 2.8        |

**Ag<sub>2</sub>Br<sub>2</sub>**

| <i>paths</i>  | $\Delta E_{\text{int}}$ | $\Delta E_{\text{Pauli}}$ | $\Delta E_{\text{elstat}}$ | $\Delta E_{\text{oi}}$ | <i>%elstat</i> | <i>%oi</i> |
|---------------|-------------------------|---------------------------|----------------------------|------------------------|----------------|------------|
| <b>Path 1</b> | -374.9                  | 198.2                     | -454.3                     | -118.9                 | 79.3           | 20.7       |
| <b>Path 2</b> | -374.9                  | 220.6                     | -433.6                     | -161.9                 | 72.8           | 27.2       |
| <b>Path 3</b> | -374.9                  | 189.5                     | -407.4                     | -157.0                 | 72.2           | 27.8       |
| <b>Path 4</b> | -374.9                  | 220.9                     | -430.9                     | -164.9                 | 72.3           | 27.7       |
| <b>Path 5</b> | -374.9                  | 230.9                     | -426.5                     | -179.3                 | 70.4           | 29.6       |
| <b>Path 6</b> | -374.9                  | 206.9                     | -439.7                     | -142.1                 | 75.6           | 24.4       |
| <b>Path 7</b> | -374.9                  | 207.9                     | -447.5                     | -135.3                 | 76.8           | 23.2       |
| <b>Path 8</b> | -374.9                  | 190.0                     | -414.2                     | -150.7                 | 73.3           | 26.7       |
| <b>Path 9</b> | -374.9                  | 169.8                     | -408.4                     | -136.3                 | 75.0           | 25.0       |
|               | 0.0                     | 14.4                      | 15.3                       | 20.4                   | 2.7            | 2.7        |

**Ag<sub>2</sub>I<sub>2</sub>**

| <i>paths</i>  | $\Delta E_{\text{int}}$ | $\Delta E_{\text{Pauli}}$ | $\Delta E_{\text{elstat}}$ | $\Delta E_{\text{oi}}$ | <i>%elstat</i> | <i>%oi</i> |
|---------------|-------------------------|---------------------------|----------------------------|------------------------|----------------|------------|
| <b>Path 1</b> | -369.5                  | 210.0                     | -442.8                     | -136.6                 | 76.4           | 23.6       |
| <b>Path 2</b> | -369.5                  | 236.8                     | -431.9                     | -174.3                 | 71.2           | 28.8       |
| <b>Path 3</b> | -369.5                  | 190.0                     | -381.3                     | -178.1                 | 68.2           | 31.8       |
| <b>Path 4</b> | -369.5                  | 235.5                     | -425.8                     | -179.2                 | 70.4           | 29.6       |
| <b>Path 5</b> | -369.5                  | 245.0                     | -416.5                     | -198.0                 | 67.8           | 32.2       |
| <b>Path 6</b> | -369.5                  | 220.9                     | -434.3                     | -156.1                 | 73.6           | 26.4       |
| <b>Path 7</b> | -369.5                  | 218.5                     | -438.5                     | -149.4                 | 74.6           | 25.4       |
| <b>Path 8</b> | -369.5                  | 200.7                     | -407.6                     | -162.6                 | 71.5           | 28.5       |
| <b>Path 9</b> | -369.5                  | 173.9                     | -393.3                     | -150.1                 | 72.4           | 27.6       |
|               | 0.0                     | 18.8                      | 20.9                       | 21.0                   | 2.8            | 2.8        |

**Hg<sub>2</sub>O<sub>2</sub>**

| <i>paths</i>  | $\Delta E_{\text{int}}$ | $\Delta E_{\text{Pauli}}$ | $\Delta E_{\text{elstat}}$ | $\Delta E_{\text{oi}}$ | <i>%elstat</i> | <i>%oi</i> |
|---------------|-------------------------|---------------------------|----------------------------|------------------------|----------------|------------|
| <b>Path 1</b> | -1798.6                 | 387.4                     | -1786.7                    | -399.2                 | 81.7           | 18.3       |
| <b>Path 2</b> | -1798.6                 | 406.4                     | -1478.2                    | -726.8                 | 67.0           | 33.0       |
| <b>Path 3</b> | -1798.6                 | 375.4                     | -1644.0                    | -530.0                 | 75.6           | 24.4       |
| <b>Path 4</b> | -1798.6                 | 403.8                     | -1501.6                    | -700.8                 | 68.2           | 31.8       |
| <b>Path 5</b> | -1798.6                 | 450.7                     | -1587.3                    | -662.0                 | 70.6           | 29.4       |
| <b>Path 6</b> | -1798.6                 | 386.2                     | -1556.5                    | -628.3                 | 71.2           | 28.8       |
| <b>Path 7</b> | -1798.6                 | 403.1                     | -1717.3                    | -484.4                 | 78.0           | 22.0       |
| <b>Path 8</b> | -1798.6                 | 347.7                     | -1400.8                    | -745.5                 | 65.3           | 34.7       |
| <b>Path 9</b> | -1798.6                 | 301.4                     | -1470.4                    | -629.5                 | 70.0           | 30.0       |
|               | 0.0                     | 24.4                      | 112.8                      | 121.6                  | 5.4            | 5.4        |

**Hg<sub>2</sub>S<sub>2</sub>**

| <i>paths</i>  | $\Delta E_{\text{int}}$ | $\Delta E_{\text{Pauli}}$ | $\Delta E_{\text{elstat}}$ | $\Delta E_{\text{oi}}$ | <i>%elstat</i> | <i>%oi</i> |
|---------------|-------------------------|---------------------------|----------------------------|------------------------|----------------|------------|
| <b>Path 1</b> | -1568.3                 | 495.0                     | -1614.2                    | -449.0                 | 78.2           | 21.8       |
| <b>Path 2</b> | -1568.3                 | 479.3                     | -1359.7                    | -687.8                 | 66.4           | 33.6       |
| <b>Path 3</b> | -1568.3                 | 396.9                     | -1379.9                    | -585.2                 | 70.2           | 29.8       |
| <b>Path 4</b> | -1568.3                 | 505.5                     | -1381.7                    | -692.0                 | 66.6           | 33.4       |
| <b>Path 5</b> | -1568.3                 | 571.5                     | -1432.3                    | -707.6                 | 66.9           | 33.1       |
| <b>Path 6</b> | -1568.3                 | 484.5                     | -1438.8                    | -614.0                 | 70.1           | 29.9       |
| <b>Path 7</b> | -1568.3                 | 508.1                     | -1581.8                    | -494.6                 | 76.2           | 23.8       |
| <b>Path 8</b> | -1568.3                 | 418.8                     | -1334.8                    | -652.4                 | 67.2           | 32.8       |
| <b>Path 9</b> | -1568.3                 | 321.7                     | -1337.8                    | -552.2                 | 70.8           | 29.2       |
|               | 0.0                     | 51.7                      | 101.9                      | 101.6                  | 4.3            | 4.3        |
